# Supplementary material for: Potential Surviving Effect of Cleome droserifolia Extract against Systemic Staphylococcus aureus Infection: Investigation of the Chemical Content of the Plant
Source: MDPI journal article supplement (doi:10.3390/antibiotics13050450), 2024-05-15
Supplement: s1 [file s1]

# Potential Surviving Effect of *Cleome droserifolia* Extract against Systemic *Staphylococcus aureus* Infection: Investigation of the Chemical Content of the Plant

**Table S1.** Sequences of the utilized primers

| Gene                                        | Forward Primer (5' to 3') | Reverse Primer (5' to 3') |
|---------------------------------------------|---------------------------|---------------------------|
| <i>icaA</i> (intercellular adhesion gene)   | GAGGTAAAGCCAACGCACTC      | CCTGTAACCGCACCAAGTTT      |
| <i>fnbA</i> (fibronectin-binding protein A) | AAATTGGGAGCAGCATCAGT      | GCAGCTGAATTCCCATTTC       |
| <i>cna</i> (collagen binding protein)       | AATAGAGGCGCCACGACCGT      | GTGCCTTCCCAAACCTTTTGAGC   |
| 16S rRNA (housekeeping gene)                | GGGACCCGCACAAGCGGTGG      | GGGTTGCGCTCGTTGCGGGA      |

**Figure S1.** Negative mode total ion chromatogram of LC-ESI-MS/MS of *Cleome droserifolia* methanol extract.

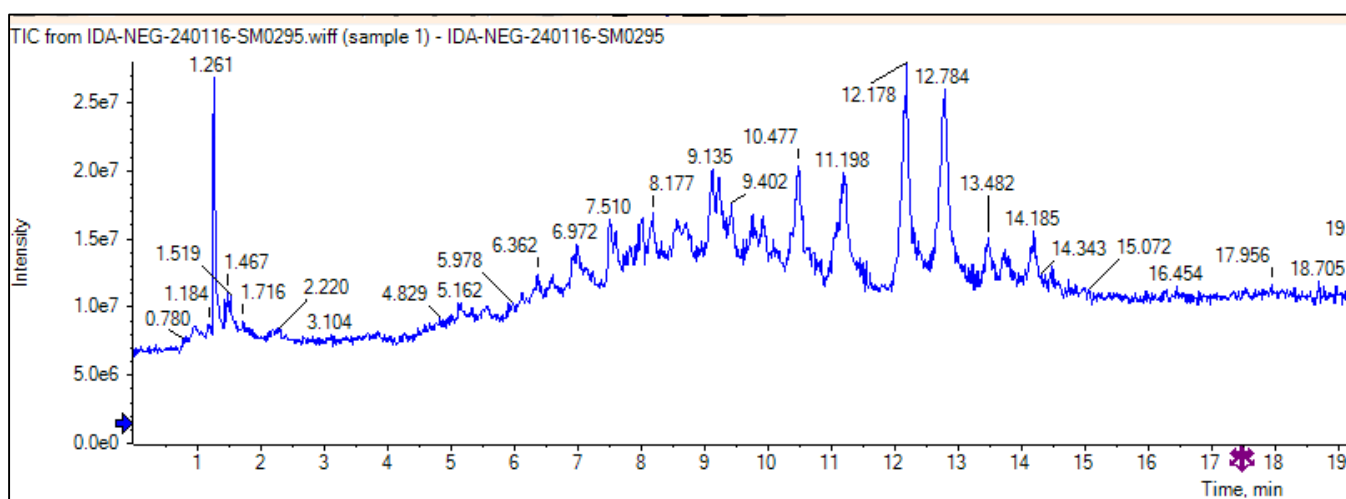

**Table S2.** Inhibition zone diameter of SAM, linezolid (positive control), and DMSA (negative control).

| Isolates   | Inhibition zone diameter (mm) |           |      |
|------------|-------------------------------|-----------|------|
|            | SAM                           | Linezolid | DMSO |
| <b>S1</b>  | 21                            | 25        | 0    |
| <b>S2</b>  | 20                            | 23        | 0    |
| <b>S3</b>  | 22                            | 25        | 0    |
| <b>S4</b>  | 23                            | 26        | 0    |
| <b>S5</b>  | 24                            | 22        | 0    |
| <b>S6</b>  | 25                            | 30        | 0    |
| <b>S7</b>  | 21                            | 27        | 0    |
| <b>S8</b>  | 22                            | 28        | 0    |
| <b>S9</b>  | 23                            | 26        | 0    |
| <b>S10</b> | 24                            | 28        | 0    |
| <b>S11</b> | 23                            | 25        | 0    |
| <b>S12</b> | 24                            | 26        | 0    |
| <b>S13</b> | 23                            | 23        | 0    |
| <b>S14</b> | 23                            | 27        | 0    |
| <b>S15</b> | 23                            | 25        | 0    |
| <b>S16</b> | 24                            | 28        | 0    |
| <b>S17</b> | 25                            | 23        | 0    |
| <b>S18</b> | 23                            | 22        | 0    |
| <b>S19</b> | 21                            | 23        | 0    |
| <b>S20</b> | 22                            | 24        | 0    |
| <b>S21</b> | 23                            | 24        | 0    |
| <b>S22</b> | 23                            | 25        | 0    |
| <b>S23</b> | 20                            | 26        | 0    |

**Table S3.** Minimum inhibitory concentrations (MICs) of SAM.

| Isolate code | MIC (µg/mL) | Isolate code | MIC (µg/mL) |
|--------------|-------------|--------------|-------------|
| S1           | 128         | S13          | 128         |
| S2           | 128         | S14          | 256         |
| S3           | 256         | S15          | 128         |
| S4           | 128         | S16          | 512         |
| S5           | 512         | S17          | 512         |
| S6           | 512         | S18          | 256         |
| S7           | 128         | S19          | 128         |
| S8           | 128         | S20          | 128         |
| S9           | 512         | S21          | 512         |
| S10          | 256         | S22          | 256         |
| S11          | 256         | S23          | 128         |
| S12          | 512         |              |             |
